# Supplementary material
Source: PubMed Central journal article supplement (PMC8973178)
Supplement: boe-13-3-1609-s001.pdf [file boe-13-3-1609-s001.pdf]

## Small form factor flow virometer for SARS-CoV-2: supplement

RUBAIYA HUSSAIN,<sup>1,6</sup>  ALFREDO E. ONGARO,<sup>1,6,7</sup>  MARIA L. RODRIGUEZ DE LA CONCEPCIÓN,<sup>2,6</sup> EWELINA WAJS,<sup>1,8</sup> EVA RIVEIRA-MUÑOZ,<sup>2</sup> ESTER BALLANA,<sup>2</sup> JULIÀ BLANCO,<sup>2</sup> RUTH TOLEDO,<sup>3</sup> ANNA CHAMORRO,<sup>3</sup> MARTA MASSANELLA,<sup>2</sup> LOURDES MATEU,<sup>3</sup> EULALIA GRAU,<sup>2</sup> BONAVENTURA CLOTET,<sup>2,3,4</sup> JORGE CARRILLO,<sup>2,9</sup> AND VALERIO PRUNERI<sup>1,5</sup>

<sup>1</sup>ICFO-Institut de Ciències Fotòniques, The Barcelona Institute of Science and Technology, 08860, Castelldefels (Barcelona), Spain

<sup>2</sup>IrsiCaixa AIDS Research Institute, Germans Trias i Pujol Research Institute (IGTP), Can Ruti Campus, UAB, 08916, Badalona, Catalonia, Spain

<sup>3</sup>Infectious Diseases Department, Fight against AIDS Foundation (FLS), Germans Trias i Pujol Hospital, 08916, Badalona, Catalonia, Spain

<sup>4</sup>University of Vic–Central University of Catalonia (UVic-UCC), 08500, Vic, Catalonia, Spain

<sup>5</sup>ICREA- Institució Catalana de Recerca i Estudis Avançats, 08010, Barcelona, Spain

<sup>6</sup>Contributed equally

<sup>7</sup>[alfredo.ongaro@icfo.eu](mailto:alfredo.ongaro@icfo.eu)

<sup>8</sup>[ewelina.wajs@icfo.eu](mailto:ewelina.wajs@icfo.eu)

<sup>9</sup>[jcarrillo@irsicaixa.es](mailto:jcarrillo@irsicaixa.es)

---

This supplement published with Optica Publishing Group on 22 February 2022 by The Authors under the terms of the [Creative Commons Attribution 4.0 License](https://creativecommons.org/licenses/by/4.0/) in the format provided by the authors and unedited. Further distribution of this work must maintain attribution to the author(s) and the published article's title, journal citation, and DOI.

Supplement DOI: <https://doi.org/10.6084/m9.figshare.19064411>

Parent Article DOI: <https://doi.org/10.1364/BOE.450212>

# Supplementary Information of

## A small form factor flow virometer for SARS-CoV-2

**Authors:** Rubaiya Hussain<sup>1,†</sup>, Alfredo E. Ongaro<sup>1,†, 6</sup>, Maria L. Rodriguez DE La Concepción<sup>2,†</sup>, Ewelina Wajs<sup>1,7</sup>, Eva Riveira-Muñoz<sup>2</sup>, Ester Ballana<sup>2</sup>, Julià Blanco<sup>2</sup>, Ruth Toledo<sup>3</sup>, Anna Chamorro<sup>3</sup>, Marta Massanella<sup>2</sup>, Lourdes Mateu<sup>3</sup>, Eulalia Grau<sup>2</sup>, Bonaventura Clotet<sup>2,3,4</sup>, Jorge Carrillo<sup>2, 8</sup> & Valerio Pruneri<sup>1,5</sup>

### **Affiliations:**

<sup>1</sup> ICFO-Institut de Ciències Fotòniques, The Barcelona Institute of Science and Technology, 08860, Castelldefels (Barcelona), Spain

<sup>2</sup> IrsiCaixa AIDS Research Institute, Germans Trias i Pujol Research Institute (IGTP), Can Ruti Campus, UAB, 08916, Badalona, Catalonia, Spain

<sup>3</sup> Infectious Diseases Department, Fight against AIDS Foundation (FLS), Germans Trias i Pujol Hospital, 08916, Badalona, Catalonia, Spain

<sup>4</sup> University of Vic–Central University of Catalonia (UVic-UCC), 08500, Vic, Catalonia, Spain

<sup>5</sup> ICREA- Institució Catalana de Recerca i Estudis Avançats, 08010, Barcelona, Spain

*† These authors contributed equally to this work*

<sup>6</sup> [alfredo.ongaro@icfo.eu](mailto:alfredo.ongaro@icfo.eu)

<sup>7</sup> [ewelina.wajs@icfo.eu](mailto:ewelina.wajs@icfo.eu)

<sup>8</sup> [jcarrillo@irsicaixa.es](mailto:jcarrillo@irsicaixa.es)

## 1. Comparison of commercial and laboratory tests for SARS-CoV-2 detection

| Type of Test                   | Detection Method                                                                                                                                                      | Specimen                                              | Time to Results                                 | Sensitivity*                           | Specificity* | Assay Complexity** | Portability |
|--------------------------------|-----------------------------------------------------------------------------------------------------------------------------------------------------------------------|-------------------------------------------------------|-------------------------------------------------|----------------------------------------|--------------|--------------------|-------------|
| RT-PCR                         | Molecular assay for qualitative/ quantitative detection of specific gene sequences of SARS-CoV-2                                                                      | Upper and lower respiratory specimens, sputum, saliva | 2-4 hours                                       | 87.5% – 100%                           | 90% - 100%   | Middle-to-High     | Yes         |
| RT-LAMP                        | Molecular assay for qualitative detection of specific gene sequences of SARS-CoV-2                                                                                    | Anterior nasal/ nasopharyngeal swab, sputum, saliva   | 15-60 minutes                                   | 93% – 100%                             | 98% - 100%   | Middle             | Yes         |
| Antibody/ Serology based tests | Enzyme linked immunosorbent assay (ELISA), Neutralization assay, Chemiluminescent immunoassay for qualitative/ quantitative detection of antibodies against the virus | Serum, plasma, whole blood                            | 10 min – 5 days (depending on detection method) | 14% (after 7 days of infection) - 100% | 93% - 100%   | Middle-to-High     | No          |
| Rapid Antigen Tests (RAT)      | Lateral flow immunoassay for qualitative detection of SARS-CoV-2 nucleocapsid protein                                                                                 | Anterior nasal/ nasopharyngeal swab                   | 15 – 30 min                                     | 80% - 97%                              | 96.6% - 100% | Low                | Yes         |
| FVR                            | <b>Flow virometry for qualitative/ quantitative detection of SARS-CoV-2 spike protein</b>                                                                             | Saliva                                                | 25 – 30 min                                     | 92%                                    | 90%          | Low-to-Middle      | Yes         |

**Table S1. A comparison of commercial and laboratory tests for detection of SARS-CoV-2.<sup>1</sup>**

\* Depending on manufacturer/ sample type/ collection

\*\* Low= does not require the use of pipette and it needs little operational steps.

Middle = it requires the use of pipette and might require the use of additional specialized equipment (other than the detection system).

High = it requires the use of trained personnel, pipette and additional specialized equipment (other than the detection system).



CoV-2 spike proteins were tested to establish the incubation time. From **Supplementary Fig. 2b** the optimum labelling time was found to be around 20 minutes.

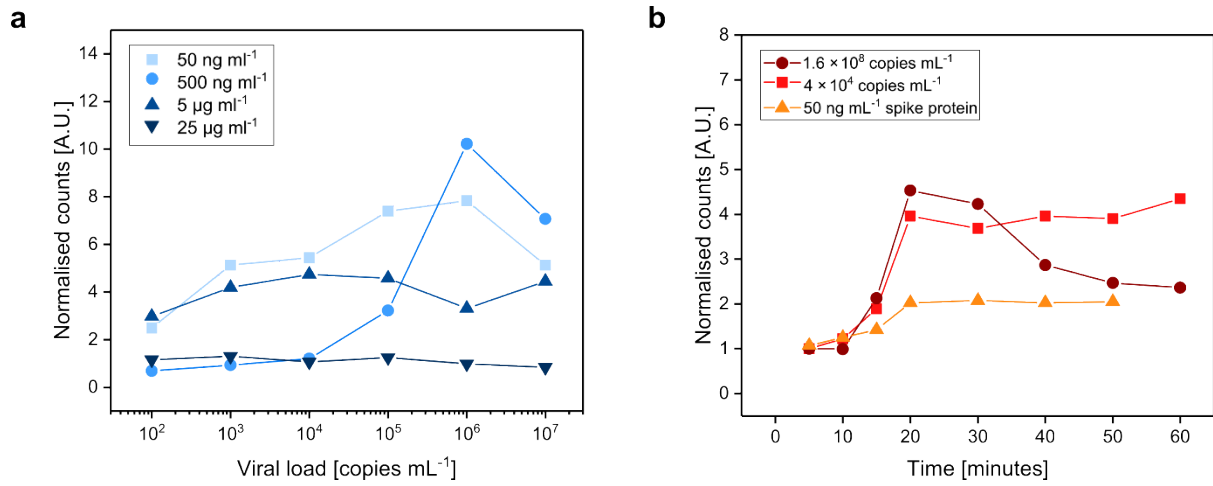

**Supplementary Figure 2. Labelling protocol optimization.** (a) Determination of optimal antibody concentration. Four antibody concentrations, 25 µg mL<sup>-1</sup>, 5 µg mL<sup>-1</sup>, 500 ng mL<sup>-1</sup> and 50 ng mL<sup>-1</sup> were used for labelling SARS-CoV-2 positive samples with varying viral load from 10<sup>7</sup> copies mL<sup>-1</sup> to 10<sup>2</sup> copies mL<sup>-1</sup>; (b) determination of optimal incubation time for labelling saliva samples with 50 ng mL<sup>-1</sup> anti-SARS-CoV spike antibodies.

**4. Stimulated emission depletion microscopy (STED) for analysis of only anti-SARS-CoV spike antibodies and labelled SARS-CoV-2 positive saliva samples.**

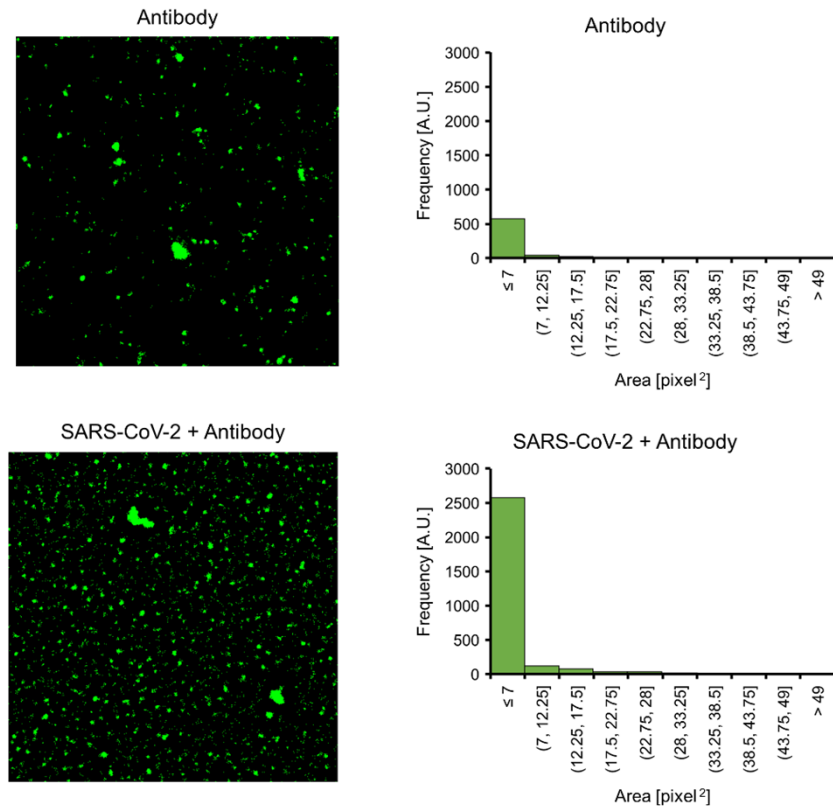

**Supplementary Figure 3. A super-resolution microscopy, STED images of only anti-SARS-CoV spike antibodies (top) and labelled SARS-CoV-2 positive saliva samples (bottom).** Corresponding plots of frequency vs area show (bottom) a 5-fold increase in fluorescence signal in labelled SARS-CoV-2 positive saliva samples, while (top) anti-SARS-CoV spike antibodies only 1-fold increase in fluorescence signal. Analysis were performed with ImageJ 1.53c.

## 5. Quantification of SARS-CoV-2 in saliva samples – clinical validation.

### FVR Immunoassay: blind test

When comparing the signal obtained from the FVR with respect to the RT-PCR quantified viral load, the response registered is not linear over the full viral load range of the samples tested. More specifically, the response is linear and monotonically increasing for low concentrations. For concentrations higher than  $10^7$  copies  $\text{mL}^{-1}$ , the signal start decreasing, almost linearly. A possible explanation for this behaviour is that the FVR response is dependent on the antigen concentration. Taking a closer look at the shape of the curve in **Supplementary Fig. 4**, we can identify two different regions: (i) antibody excess region and (ii) antigen excess region. In the antibody excess region, the antigens on the viral particles act as a bridge and coagulate several labelled antibodies, thus the increase of the signal with respect to the blank solution and the increase of the signal as the viral particle concentration increases. The signal starts decreasing in the antigen excess region probably because the bridging process is unfavoured and the signal from the labelled antibodies is masked by the presence of viral particle in excess.

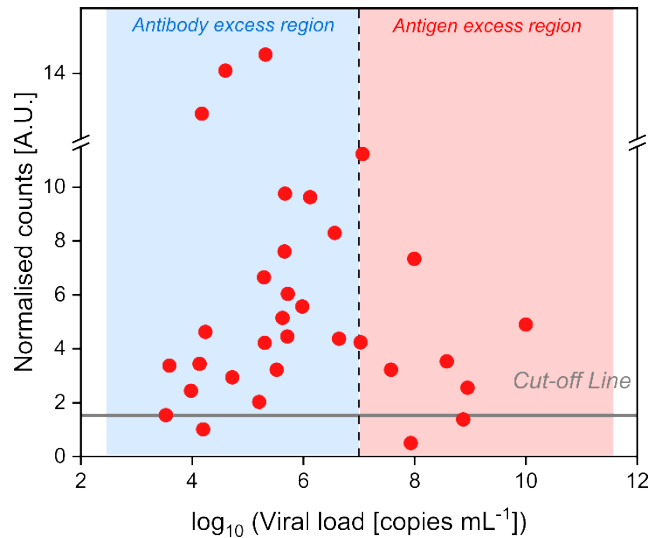

**Supplementary Figure 4. FVR Normalized Counts vs RT-qPCR.** The red dots represent the normalized counts from positive SARS-CoV-2 saliva samples measured with FVR plotted against the log of the viral load determined from RT-qPCR. Grey line indicates the cut-off line. Shaded blue area is the antibody excess region. Shaded red area is the antigen excess region. Vertical black dashed line divide the antibody and antigen excess region.

### FVR vs. RT- qPCR

The viral load quantification was performed using the calibration curve with equation  $y=2.1742x-2.3842$ . The obtained viral load value was multiplied by 100 in order to take into account the 1:100 dilution factor used to prepare the blind test samples. We calculated the statistical relationship between the viral load measured with RT-qPCR and with our FVR, by performing a Pearson's correlation test (**Supplementary Fig. 5a**). We found a good correlation with a coefficient  $r$  of 0.66 and a  $p$  value of 0.001 for the blind samples falling into our analytical measuring range ( $<10^7$  copies  $\text{mL}^{-1}$ ). For samples with viral load above the analytical range of the FVR, we were not be able to quantify the viral load correctly but were still able to determine if the tested sample was positive or negative. To further understand the correlation between the FVR and the RT-qPCR we analysed the agreement of the two methods with the Bland-Altman plot<sup>2</sup> (**Supplementary Fig. 5b**). Given the normal distribution of the difference of the measurement of the two methods, we set the limit of the agreement as the mean of the difference of the measurements plus 1.96 time its standard deviation. The average of the differences is 0.138. This means that FVR measures on average 0.138 times more the log<sub>10</sub> of the viral load with respect to RT-qPCR.

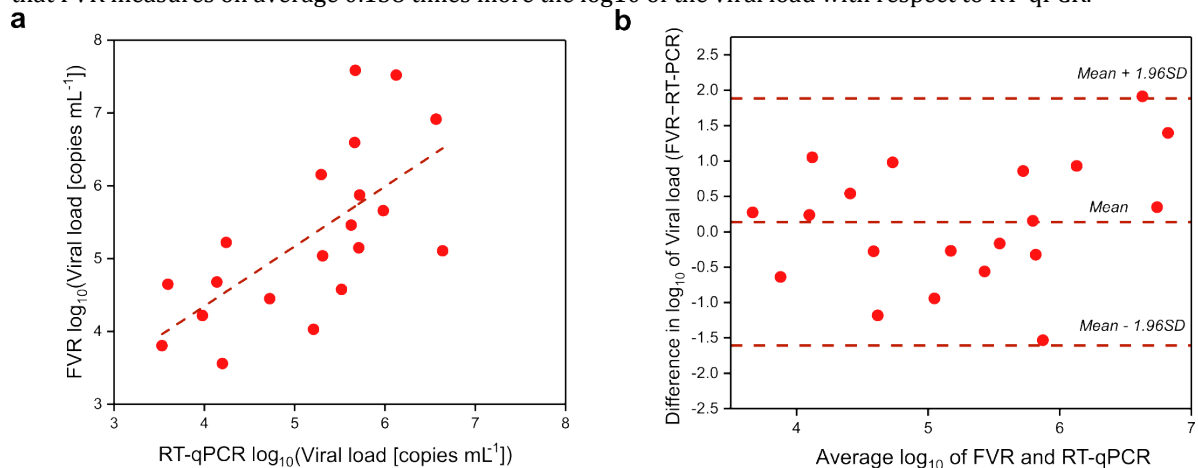

**Supplementary Figure 5. FVR vs RT-qPCR.** (a) Red dots represent the viral load quantification with the FVR reader versus the RT-qPCR viral load. Dashed red line is the linear regression of the quantification curve. The equation of the linear regression is  $y=0.8216x + 1.0612$  ( $R^2=0.43$ ); (b) difference in the viral load prediction between the FVR reader and the RT-qPCR. The normalized root-mean-square deviation NRMSD associated to the FVR predicted viral load is 9.2%.

## References

1. Antibody, Antigen and Molecular Tests for COVID-19. *JOHNS HOPKINS CENTER FOR HEALTH SECURITY* (2021).
2. Bland, J. M. & Altman Douglas G. Correlation, Agreement, and Bland-Altman Analysis: Statistical Analysis of Method Comparison Studies. *Lancet* 307–310 (1986). doi:10.1016/j.ajo.2008.09.032
